# Supplementary material
Source: publisher site journal article supplement (https://www.oncotarget.com/article/28627)
Supplement: Supplementary file 1 [file 28627]

## Addendum

## Addendum: Using cancer proteomics data to identify gene candidates for therapeutic targeting

**Diana Monsivais<sup>1,2,3</sup>, Sydney E. Parks<sup>1,2,4</sup>, Darshan S. Chandrashekar<sup>5,6,7</sup>, Sooryanarayana Varambally<sup>5,6,8</sup> and Chad J. Creighton<sup>3,9,10</sup>**

<sup>1</sup>Center for Drug Discovery, Baylor College of Medicine, Houston, TX 77030, USA

<sup>2</sup>Department of Pathology and Immunology, Baylor College of Medicine, Houston, TX 77030, USA

<sup>3</sup>Dan L. Duncan Comprehensive Cancer Center Division of Biostatistics, Baylor College of Medicine, Houston, TX 77030, USA

<sup>4</sup>Cancer and Cell Biology Program, Baylor College of Medicine, Houston, TX 77030, USA

<sup>5</sup>O'Neal Comprehensive Cancer Center, University of Alabama at Birmingham, Birmingham, AL 35233, USA

<sup>6</sup>Molecular and Cellular Pathology, Department of Pathology, University of Alabama at Birmingham, Birmingham, AL 35233, USA

<sup>7</sup>Genomic Diagnostics and Bioinformatics, Department of Pathology, University of Alabama at Birmingham, Birmingham, AL 35233, USA

<sup>8</sup>The Informatics Institute, University of Alabama at Birmingham, Birmingham, AL 35233, USA

<sup>9</sup>Human Genome Sequencing Center, Baylor College of Medicine, Houston, TX 77030, USA

<sup>10</sup>Department of Medicine, Baylor College of Medicine, Houston, TX 77030, USA

**Published:**

**Copyright:** © 2024 Monsivais et al. This is an open access article distributed under the terms of the [Creative Commons Attribution License](#) (CC BY 4.0), which permits unrestricted use, distribution, and reproduction in any medium, provided the original author and source are credited.

**This article has an addendum:** This article received a publication fee waiver.

Original article: Oncotarget. 2023; 14:399–412. <https://doi.org/10.18632/oncotarget.28420>
